# Supplementary material for: A new method for the preparation of silica-polycarbazole composite particles of a core-shell morphology
Source: Royal Society of Chemistry journal article supplement (doi:10.1039/b813482k), 2008-11-17

## Electronic Supplementary Information

### A New Method for the Preparation of Silica-Polycarbazole Composite Particles of a Core-Shell Morphology

By Anna Peled, Vadim Kotlyar, and Jean-Paul Lellouche\*

\* Corresponding author. E-mail: lellouj@mail.biu.ac.il

1. High resolution SEM microphotographs and compositional EDS Linescan analysis of a biphasic SiO<sub>2</sub>/polyDCL composite (C and Si elements appearing as *red* and *green* lines respectively) p. 2
2. SEM microphotographs of particulate systems obtained using 5.0 (A), 7.0 (B), 10.0 (C), & 15.0 (D) molar % of reagent **2** in W/O micro-emulsion experiments p. 2-3
3. FTIR spectra of unmodified SiO<sub>2</sub> nanoparticles (NPs, *blue* graph), hybrid H-SiO<sub>2</sub>-g-Cbz<sub>2%</sub> NPs (*red* graph), and H-SiO<sub>2</sub>-g-Cbz<sub>2%</sub>/polyDCL (*green* graph) composite particles p. 3
4. UV-vis absorption (*left*) and fluorescence (*right*) spectra of hybrid H-SiO<sub>2</sub>-g-Cbz<sub>2%</sub> NPs in EtOH (1.0 mg/mL) using a Cary 300 UV-Vis and an AMINCO-Bowman Series 2 fluorescence spectrophotometer respectively p. 3
5. Digital photograph of unmodified SiO<sub>2</sub> (*left*) and hybrid H-SiO<sub>2</sub>-g-Cbz<sub>2%</sub> (*right*) NPs (EtOH suspension, 1.0 mg/mL) showing the fluorescence of Cbz-containing H-SiO<sub>2</sub>-g-Cbz<sub>2%</sub> NPs (CAMAG Spectroline CX UV cabinet,  $\lambda_{\text{excitation}} = 366 \text{ nm}$ ) p. 4
6. XPS spectra of unmodified SiO<sub>2</sub> (*top*) and of hybrid H-SiO<sub>2</sub>-g-Cbz<sub>2%</sub> NPs (*bottom*) p. 5
7. XPS spectra of the *biphasic* SiO<sub>2</sub>/polyDCL material (*top*) and of H-SiO<sub>2</sub>-g-Cbz<sub>2%</sub>/polyDCL composite particles of a core-shell morphology (*bottom*) p. 6

**ESI 1. High resolution SEM microphotographs and compositional EDS Linescan analysis of a biphasic SiO<sub>2</sub>/polyDCL composite (C and Si elements appearing as *red* and *green* lines respectively)**

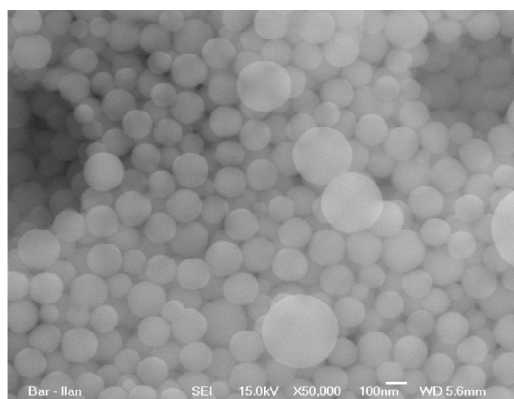

**Base(2)**

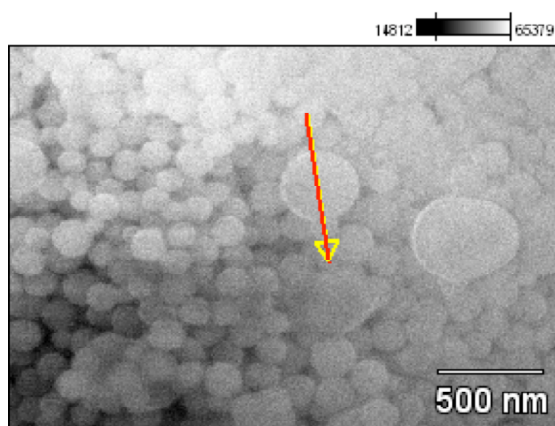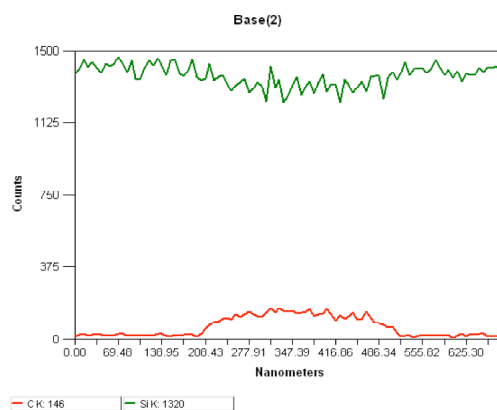

**ESI 2. SEM microphotographs of particulate systems obtained using 5.0 (A), 7.0 (B), 10.0 (C), & 15.0 (D) molar % of reagent 2 in W/O micro-emulsion experiments**

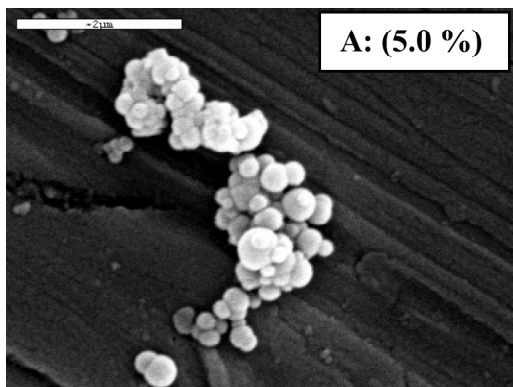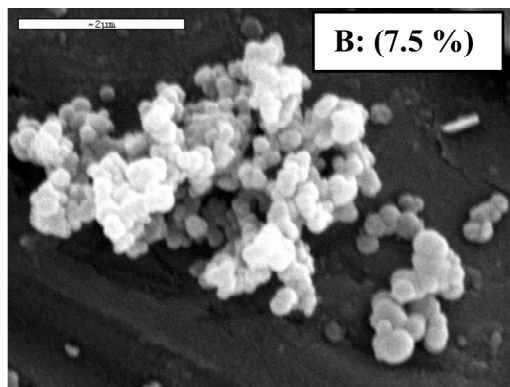

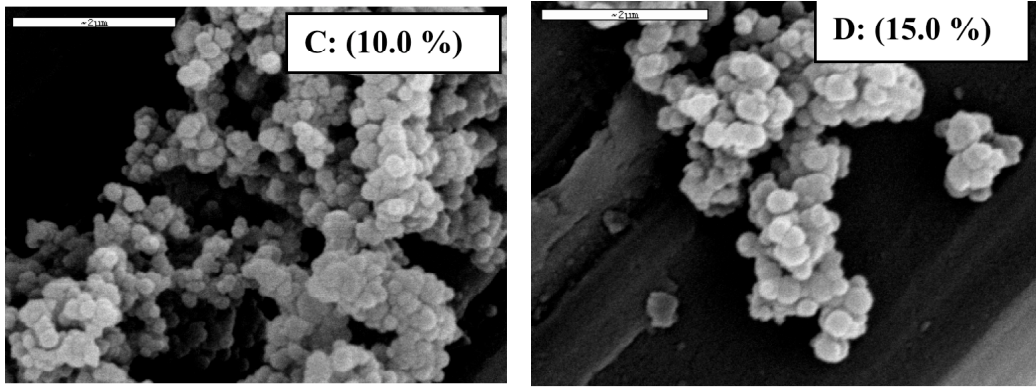

**ESI 3.** FTIR spectra of unmodified SiO<sub>2</sub> NPs (*blue graph*), hybrid H-SiO<sub>2</sub>-g-Cbz<sub>2</sub>% NPs (*red graph*), and H-SiO<sub>2</sub>-g-Cbz<sub>2</sub>%/polyDCL (*green graph*) composite particles

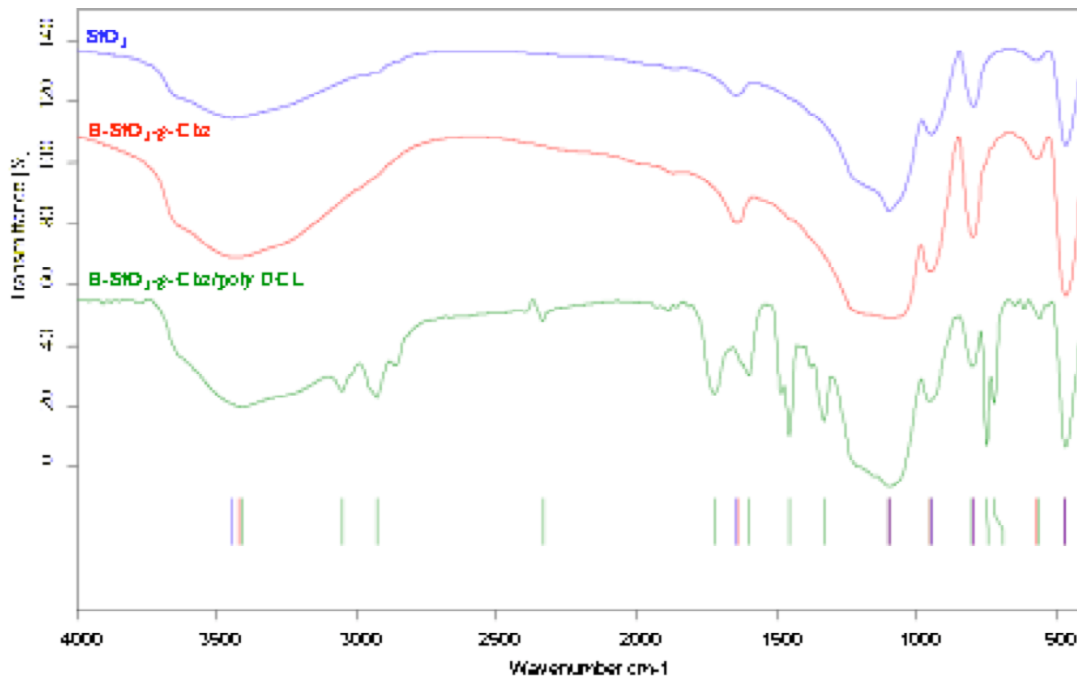

**ESI 4.** UV-vis absorption (*left*) and fluorescence (*right*) spectra of hybrid H-SiO<sub>2</sub>-g-Cbz<sub>2</sub>% NPs in EtOH (1.0 mg/mL) using a Cary 300 UV-Vis and an AMINCO-Bowman Series 2 fluorescence spectrophotometer respectively

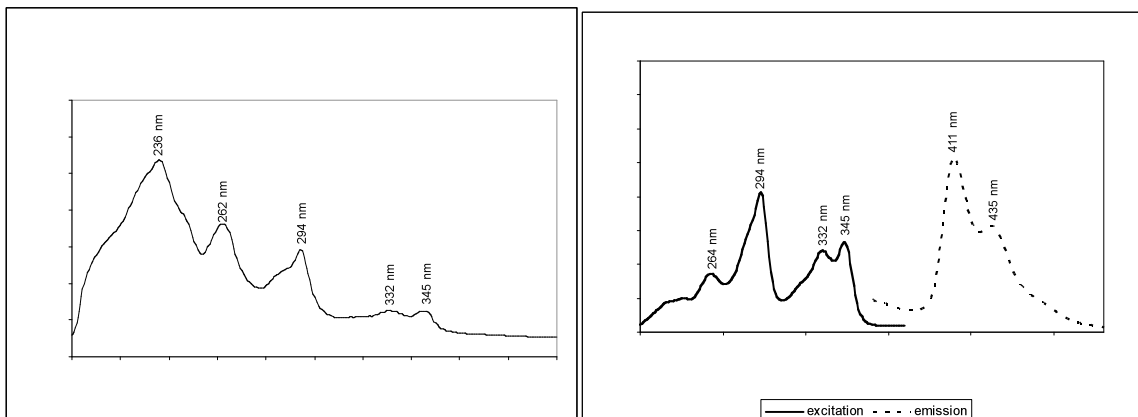

**ESI 5.** Digital photograph of unmodified SiO<sub>2</sub> (*left*) and hybrid H-SiO<sub>2</sub>-g-Cbz<sub>2%</sub> (*right*) NPs (EtOH suspension, 1.0 mg/mL) showing the fluorescence of Cbz-containing H-SiO<sub>2</sub>-g-Cbz<sub>2%</sub> NPs (CAMAG Spectroline CX UV cabinet,  $\lambda_{\text{excitation}} = 366 \text{ nm}$ )

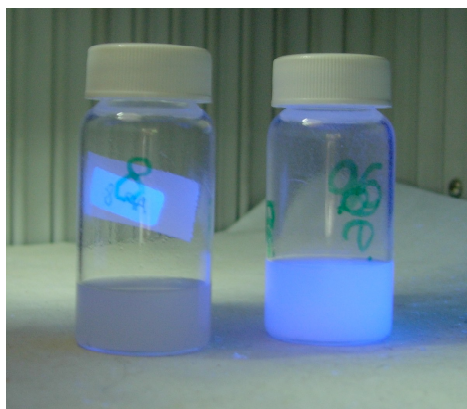

**ESI 6.** XPS spectra of unmodified SiO<sub>2</sub> (*top*) and of hybrid H-SiO<sub>2</sub>-g-Cbz<sub>2</sub>% NPs (*bottom*)

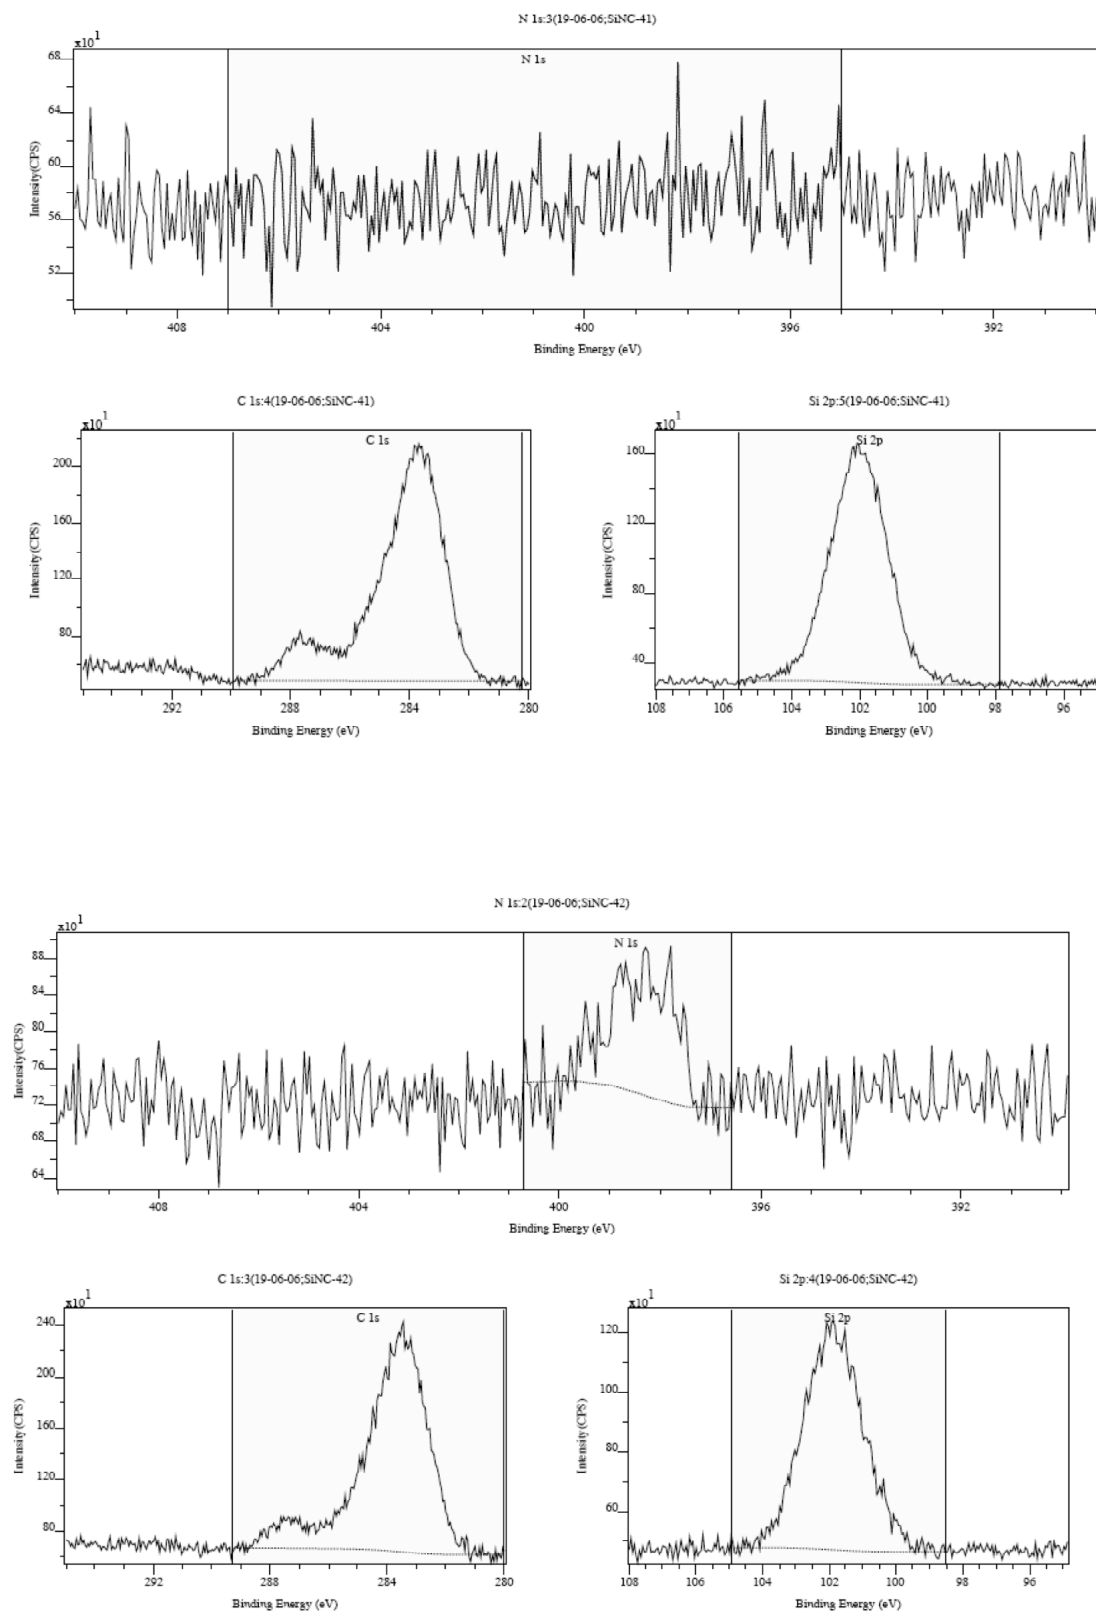

**ESI 7.** XPS spectra of the *biphasic* SiO<sub>2</sub>/polyDCL material (*top*) and of H-SiO<sub>2</sub>-g-Cbz<sub>2</sub>%/polyDCL composite particles of a core-shell morphology (*bottom*)

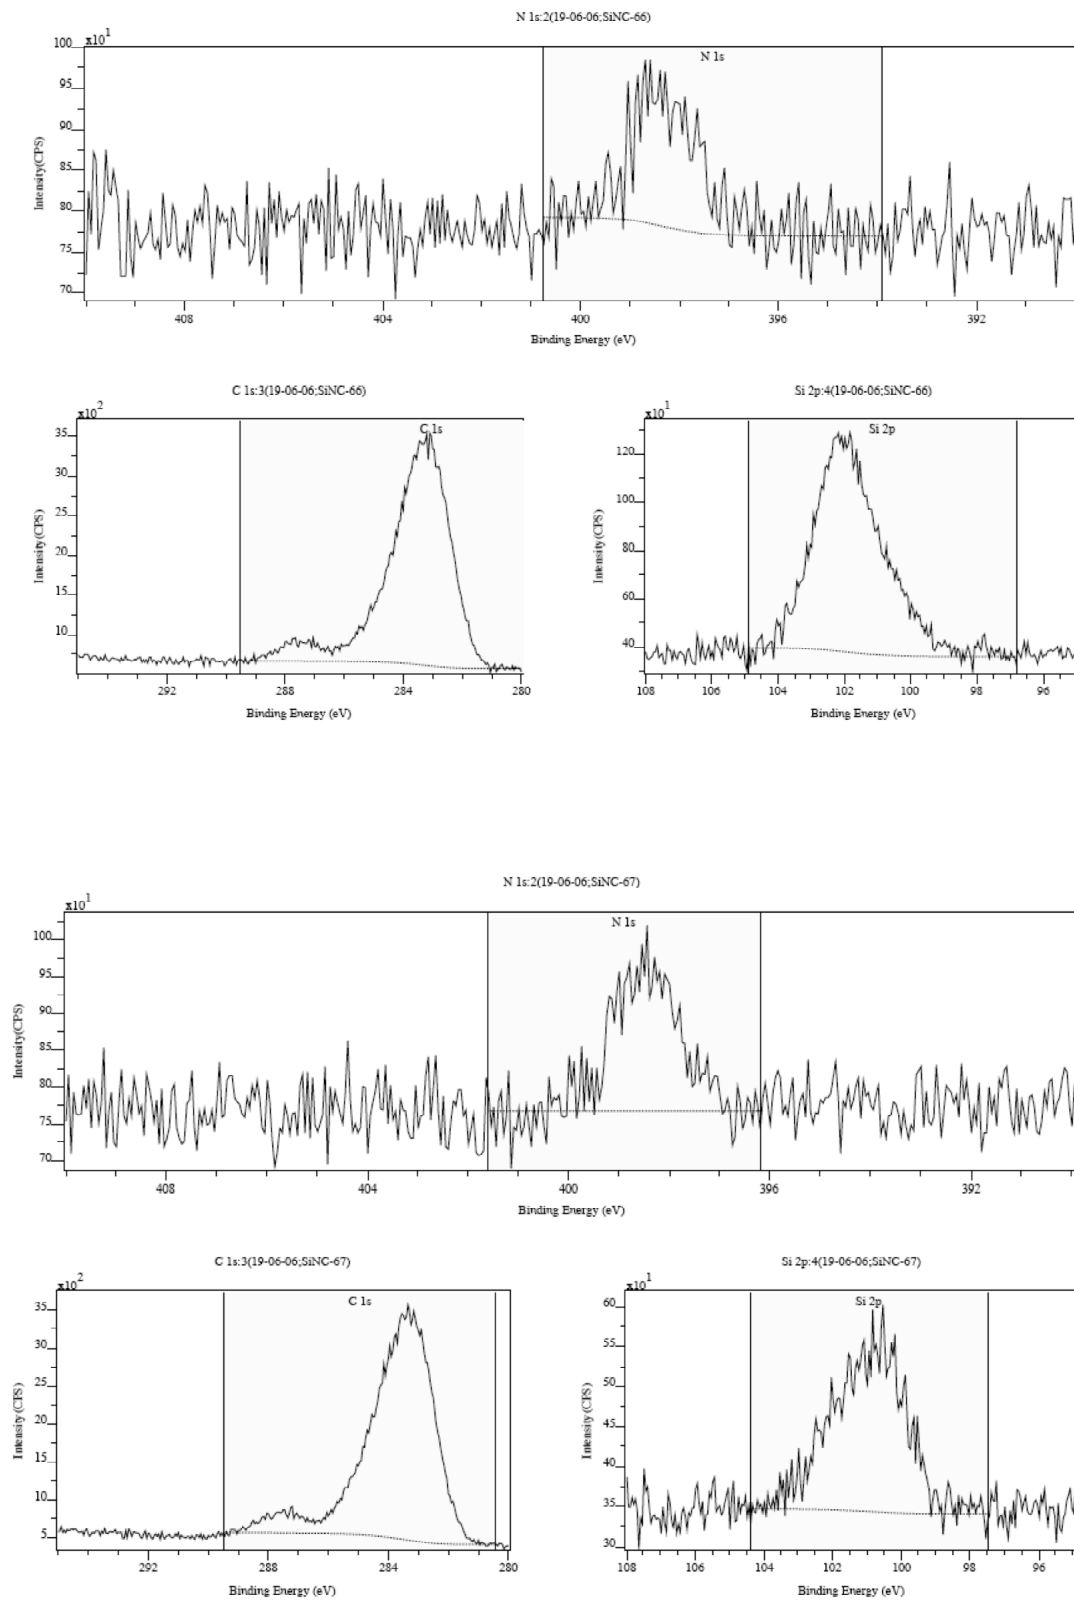

Supplement: b813482k.pdf [file b813482k.pdf]
